# Supplementary material for: Scope actuation system for articulated laparoscopes
Source: PubMed Central journal article supplement (PMC10017632; doi:10.1007/s00464-023-09904-z), 2023-02-07
Supplement: 464_2023_9904_MOESM1_ESM.pdf [file 464_2023_9904_MOESM1_ESM.pdf]

# Supporting Document

In the mixed effects model for all three response variables the Manual Mode was treated as baseline and the mixed effect model examined whether each of the remaining six modes have significant differences when compared with the baseline. The model outputs per response are as follow:

## Duration to complete the task

Fixed effects:

|                               | Estimate | Std. Error | df    | t value | Pr(> t ) |     |
|-------------------------------|----------|------------|-------|---------|----------|-----|
| (Intercept)                   | 178.16   | 9.37       | 24.08 | 19.014  | 5.24e-16 | *** |
| Inferior_to_Superior_30_Tilt  | -14.32   | 11.43      | 23.41 | -1.253  | 0.22265  |     |
| Inferior_to_Superior_45_Tilt  | -25.65   | 11.43      | 23.41 | -2.244  | 0.03455  | *   |
| Inferior_to_Superior_60_Tilt  | -23.75   | 11.43      | 23.41 | -2.078  | 0.04886  | *   |
| Anterior_to_Posterior_60_Tilt | -42.70   | 11.43      | 23.41 | -3.737  | 0.00105  | **  |
| Superior_to_Inferior_60_Tilt  | -29.79   | 11.43      | 23.41 | -2.607  | 0.01564  | *   |
| Posterior_to_Anterior_60_Tilt | -28.56   | 11.43      | 23.41 | -2.500  | 0.01987  | *   |

## Duration for which scope focus shifts outside the track

Fixed effects:

|                               | Estimate | Std. Error | df     | t value | Pr(> t ) |     |
|-------------------------------|----------|------------|--------|---------|----------|-----|
| (Intercept)                   | 45.400   | 3.061      | 9.582  | 14.83   | 6.29e-08 | *** |
| Inferior_to_Superior_30_Tilt  | -33.820  | 2.852      | 24.000 | -11.86  | 1.60e-11 | *** |
| Inferior_to_Superior_45_Tilt  | -38.492  | 2.852      | 24.000 | -13.50  | 1.06e-12 | *** |
| Inferior_to_Superior_60_Tilt  | -36.330  | 2.852      | 24.000 | -12.74  | 3.59e-12 | *** |
| Anterior_to_Posterior_60_Tilt | -36.580  | 2.852      | 24.000 | -12.83  | 3.11e-12 | *** |
| Superior_to_Inferior_60_Tilt  | -35.320  | 2.852      | 24.000 | -12.38  | 6.49e-12 | *** |
| Posterior_to_Anterior_60_Tilt | -33.360  | 2.852      | 24.000 | -11.70  | 2.12e-11 | *** |

## Error Counts

Fixed effects:

|                               | Estimate | Std. Error | df     | t value | Pr(> t ) |     |
|-------------------------------|----------|------------|--------|---------|----------|-----|
| (Intercept)                   | 23.600   | 1.159      | 9.930  | 20.37   | 1.99e-09 | *** |
| Inferior_to_Superior_30_Tilt  | -18.000  | 1.098      | 24.000 | -16.39  | 1.56e-14 | *** |
| Inferior_to_Superior_45_Tilt  | -19.800  | 1.098      | 24.000 | -18.02  | 1.87e-15 | *** |
| Inferior_to_Superior_60_Tilt  | -19.000  | 1.098      | 24.000 | -17.30  | 4.70e-15 | *** |
| Anterior_to_Posterior_60_Tilt | -19.800  | 1.098      | 24.000 | -18.02  | 1.87e-15 | *** |
| Superior_to_Inferior_60_Tilt  | -19.600  | 1.098      | 24.000 | -17.84  | 2.35e-15 | *** |
| Posterior_to_Anterior_60_Tilt | -20.400  | 1.098      | 24.000 | -18.57  | 9.56e-16 | *** |

---

Significance codes: 0 '\*\*\*' 0.001 '\*\*' 0.01 '\*' 0.05 '.' 0.1 ' ' 1
